# Supplementary material
Source: MDPI journal article supplement (https://www.mdpi.com/2073-445X/10/11/1145)
Supplement: s1 [file s1]

Archive with 3 entries (3 files):
- S1.MethodsSupplemental.pdf
- S2.PMP.xlsx
- S3.bestfitmodel.xlsx
