# Supplementary material
Source: MDPI journal article supplement (https://www.mdpi.com/2073-445X/10/11/1145)
Supplement: s1 [file s1 › S2.PMP.xlsx]

## Sheet: Regional
HCI.model.averaging.results
	Model Number	Model Variables	P BMA Wghts	P BMA BB Ranks	P BMA Ranks	WAIC Wts Rank	Straight WAIC Rank	waic_wt	New Waic wt	VDEP	ANTHRO	FRAG	WATER	REGION
30	m41.reg	Response ~ ( VDEP + ANTHRO + FRAG + WATER | REGION )	1	1	0.998986	1	1	1	0.0865483	TRUE	TRUE	TRUE	TRUE	TRUE
28	m34.reg	Response ~ ( ANTHRO + FRAG + WATER | REGION )	7.86015e-15	2	0.00101447	2	2	7.65571e-15	0.0543609	FALSE	TRUE	TRUE	TRUE	TRUE
22	m31.reg	Response ~ ( VDEP + ANTHRO + FRAG | REGION )	8.92121e-43	3	1.43892e-24	4	4	8.66491e-43	0.0496101	TRUE	TRUE	TRUE	FALSE	TRUE
26	m33.reg	Response ~ ( VDEP + FRAG + WATER | REGION )	1.73505e-42	4	2.0888e-30	3	3	1.67832e-42	3.00033e-05	TRUE	FALSE	TRUE	TRUE	TRUE
20	m26.reg	Response ~ ( FRAG + WATER | REGION )	2.58773e-56	5	5.23358e-38	5	5	2.43888e-56	0.0664744	FALSE	FALSE	TRUE	TRUE	TRUE
16	m24.reg	Response ~ ( ANTHRO + FRAG | REGION )	4.66228e-63	6	4.20434e-40	6	6	4.35444e-63	0.0547465	FALSE	TRUE	TRUE	FALSE	TRUE
12	m22.reg	Response ~ ( VDEP + FRAG | REGION )	1.64923e-82	7	3.72638e-56	7	7	1.54402e-82	0.020583	TRUE	FALSE	TRUE	FALSE	TRUE
6	m13.reg	Response ~ ( FRAG | REGION )	3.17532e-106	8	1.21307e-77	8	8	2.86094e-106	0.00707235	FALSE	FALSE	TRUE	FALSE	TRUE
24	m32.reg	Response ~ ( VDEP + ANTHRO + WATER | REGION )	1.29802e-120	9	1.25957e-90	9	9	1.26169e-120	1.66857e-07	TRUE	TRUE	FALSE	TRUE	TRUE
10	m21.reg	Response ~ ( VDEP + ANTHRO | REGION )	1.20208e-168	10	1.08581e-130	10	10	1.11792e-168	0.0841049	TRUE	TRUE	FALSE	FALSE	TRUE
14	m23.reg	Response ~ ( VDEP + WATER | REGION )	1.39885e-175	11	1.01601e-134	12	12	1.31117e-175	0.0977521	TRUE	FALSE	FALSE	TRUE	TRUE
18	m25.reg	Response ~ ( ANTHRO + WATER | REGION )	2.60669e-172	12	7.90191e-135	11	11	2.43637e-172	2.97008e-06	FALSE	TRUE	FALSE	TRUE	TRUE
4	m12.reg	Response ~ ( ANTHRO | REGION )	5.52677e-219	13	4.49651e-178	13	13	4.98772e-219	4.07537e-05	FALSE	TRUE	FALSE	FALSE	TRUE
2	m11.reg	Response ~ ( VDEP | REGION )	7.45906e-228	14	1.86874e-180	14	14	6.74178e-228	0.0215464	TRUE	FALSE	FALSE	FALSE	TRUE
8	m14.reg	Response ~ ( WATER | REGION )	1.43914e-274	15	4.19551e-229	15	15	1.30731e-274	8.38428e-05	FALSE	FALSE	FALSE	TRUE	TRUE
27	m33	Response ~ VDEP + FRAG + WATER	7.3914e-275	16	9.87473e-269	16	16	3.07307e-275	0.126483	TRUE	FALSE	TRUE	TRUE	FALSE
31	m41	Response ~ VDEP + ANTHRO + FRAG + WATER	2.3914e-275	17	2.45967e-269	17	17	3.07307e-275	0.0152	TRUE	TRUE	TRUE	TRUE	FALSE
32	regional.intercept	Response ~ (1 | REGION)	0	18	5.58414e-284	30	18	0	0.030637	FALSE	FALSE	FALSE	FALSE	TRUE
23	m31	Response ~ VDEP + ANTHRO + FRAG	0	19	4.21146e-291	29	19	0	0.000170869	TRUE	TRUE	TRUE	FALSE	FALSE
13	m22	Response ~ VDEP + FRAG	0	20	8.97118e-292	28	20	0	7.33218e-05	TRUE	FALSE	TRUE	FALSE	FALSE
29	m34	Response ~ ANTHRO + FRAG + WATER	0	21	1.14891e-299	22	21	0	0.0245553	FALSE	TRUE	TRUE	TRUE	FALSE
21	m26	Response ~ FRAG + WATER	0	22	2.12978e-302	20	22	0	0.0551071	FALSE	FALSE	TRUE	TRUE	FALSE
7	m13	Response ~ FRAG	0	23	1.29782e-303	25	23	0	0.000147764	FALSE	FALSE	TRUE	FALSE	FALSE
17	m24	Response ~ ANTHRO + FRAG	0	24	1.9782e-304	27	24	0	8.68775e-05	FALSE	TRUE	TRUE	FALSE	FALSE
5	m12	Response ~ ANTHRO	0	25	0	18	30	0	0.0838729	FALSE	TRUE	FALSE	FALSE	FALSE
9	m14	Response ~ WATER	0	26	0	19	31	0	0.0529861	FALSE	FALSE	FALSE	TRUE	FALSE
11	m21	Response ~ VDEP + ANTHRO	0	27	0	21	27	0	0.0355675	TRUE	TRUE	FALSE	FALSE	FALSE
1	intercept	1	0	28	0	23	32	0	0.0230154	FALSE	FALSE	FALSE	FALSE	FALSE
19	m25	Response ~ ANTHRO + WATER	0	29	0	24	29	0	0.00906754	FALSE	TRUE	FALSE	TRUE	FALSE
25	m32	Response ~ VDEP + ANTHRO + WATER	0	30	0	26	25	0	6.01944e-08	TRUE	TRUE	FALSE	TRUE	FALSE
15	m23	Response ~ VDEP + WATER	0	31	0	31	26	0	6.65936e-05	TRUE	FALSE	FALSE	TRUE	FALSE
3	m11	Response ~ VDEP	0	32	0	32	28	0	6.2924e-06	TRUE	FALSE	FALSE	FALSE	FALSE
															# Times Each Variable Used
																VDEP	ANTHRO	FRAG	WATER	REGION
															Top 10	6	6	8	5	10
															Top Half	9	8	9	9	15
															Bottom Half	7	8	7	7	1
																					% Each Variable Used
																						VDEP	ANTHRO	FRAG	WATER	REGION
																					Top 10	0.6	0.6	0.8	0.5	1
																					Top Half	0.5625	0.5	0.5625	0.5625	0.9375
																					Bottom Half	0.4375	0.5	0.4375	0.4375	0.0625

## Sheet: CONUS
HCI.model.averaging.results
	Row.names	pbma_wts	P BMA BB Ranks	pbma_BB_wts	Stacking Rank	stacking_wts	WAIC Wts Rank	Straight WAIC Rank	waic_wt	New Waic wt	Model Variables	VDEP	ANTHRO	FRAG	WATER	REGION
14	m33	7.3914e-275	16	9.87473e-269	1	0.137379	16	16	3.07307e-275	0.126483	Response ~ VDEP + FRAG + WATER	TRUE	FALSE	TRUE	TRUE	FALSE
16	m41	2.3914e-275	17	2.45967e-269	19	0.00841867	17	17	3.07307e-275	0.0152	Response ~ VDEP + ANTHRO + FRAG + WATER	TRUE	TRUE	TRUE	TRUE	FALSE
12	m31	0	19	4.21146e-291	28	9.35644e-06	29	19	0	0.000170869	Response ~ VDEP + ANTHRO + FRAG	TRUE	TRUE	TRUE	FALSE	FALSE
7	m22	0	20	8.97118e-292	26	7.94419e-05	28	20	0	7.33218e-05	Response ~ VDEP + FRAG	TRUE	FALSE	TRUE	FALSE	FALSE
15	m34	0	21	1.14891e-299	14	0.0215461	22	21	0	0.0245553	Response ~ ANTHRO + FRAG + WATER	FALSE	TRUE	TRUE	TRUE	FALSE
11	m26	0	22	2.12978e-302	10	0.0561296	20	22	0	0.0551071	Response ~ FRAG + WATER	FALSE	FALSE	TRUE	TRUE	FALSE
4	m13	0	23	1.29782e-303	22	0.000808439	25	23	0	0.000147764	Response ~ FRAG	FALSE	FALSE	TRUE	FALSE	FALSE
9	m24	0	24	1.9782e-304	25	0.000242772	27	24	0	8.68775e-05	Response ~ ANTHRO + FRAG	FALSE	TRUE	TRUE	FALSE	FALSE
13	m32	0	30	0	23	0.000462089	26	25	0	6.01944e-08	Response ~ VDEP + ANTHRO + WATER	TRUE	TRUE	FALSE	TRUE	FALSE
8	m23	0	31	0	31	1.21657e-07	31	26	0	6.65936e-05	Response ~ VDEP + WATER	TRUE	FALSE	FALSE	TRUE	FALSE
6	m21	0	27	0	12	0.030825	21	27	0	0.0355675	Response ~ VDEP + ANTHRO	TRUE	TRUE	FALSE	FALSE	FALSE
2	m11	0	32	0	32	3.84971e-08	32	28	0	6.2924e-06	Response ~ VDEP	TRUE	FALSE	FALSE	FALSE	FALSE
10	m25	0	29	0	17	0.0110943	24	29	0	0.00906754	Response ~ ANTHRO + WATER	FALSE	TRUE	FALSE	TRUE	FALSE
3	m12	0	25	0	3	0.0927108	18	30	0	0.0838729	Response ~ ANTHRO	FALSE	TRUE	FALSE	FALSE	FALSE
5	m14	0	26	0	9	0.0567567	19	31	0	0.0529861	Response ~ WATER	FALSE	FALSE	FALSE	TRUE	FALSE
1	intercept	0	28	0	15	0.0200894	23	32	0	0.0230154	1	FALSE	FALSE	FALSE	FALSE	FALSE
																	# Times Each Variable Used
																		VDEP	ANTHRO	FRAG	WATER	REGION
																	Top 5	4	3	5	3	0
																	Top Half	4	4	8	4	0
																	Bottom Half	4	4	0	4	0
																							% Each Variable Used
																								VDEP	ANTHRO	FRAG	WATER	REGION
																							Top 5	0.8	0.6	1	0.6	0
																							Top Half	0.5	0.5	1	0.5	0
																							Bottom Half	0.5	0.5	0	0.5	0
