# Supplementary material
Source: MDPI journal article supplement (https://www.mdpi.com/2073-445X/10/11/1145)
Supplement: s1 [file s1 › S3.bestfitmodel.xlsx]

## Sheet: Sheet 1
	mean	se_mean	sd	0.025	0.25	0.5	0.75	0.975	n_eff	Rhat
b_Intercept	0.26	0.01	0.21	-0.1	0.18	0.26	0.36	0.65	546	1
sd_REGION__Intercept	0.27	0.01	0.19	0.1	0.16	0.22	0.32	0.77	681	1
sd_REGION__VDEP	0.57	0.01	0.32	0.26	0.38	0.48	0.66	1.37	742	1
sd_REGION__ANTHRO	1.41	0.03	0.66	0.69	0.99	1.24	1.65	3	620	1
sd_REGION__FRAG	0.23	0	0.1	0.12	0.17	0.21	0.27	0.49	617	1
sd_REGION__WATER	0.35	0.01	0.15	0.18	0.26	0.32	0.4	0.71	720	1
cor_REGION__Intercept__VDEP	-0.09	0.02	0.37	-0.73	-0.4	-0.11	0.17	0.61	590	1
cor_REGION__Intercept__ANTHRO	0.01	0.02	0.42	-0.77	-0.32	0.02	0.35	0.74	619	1
cor_REGION__VDEP__ANTHRO	-0.04	0.01	0.33	-0.66	-0.29	-0.05	0.22	0.59	577	1
cor_REGION__Intercept__FRAG	-0.19	0.02	0.38	-0.82	-0.5	-0.23	0.1	0.54	598	1
cor_REGION__VDEP__FRAG	-0.28	0.01	0.32	-0.78	-0.53	-0.32	-0.06	0.39	693	1
cor_REGION__ANTHRO__FRAG	-0.29	0.01	0.33	-0.81	-0.56	-0.31	-0.06	0.42	643	1
cor_REGION__Intercept__WATER	0.03	0.02	0.39	-0.67	-0.28	0.03	0.35	0.73	640	1
cor_REGION__VDEP__WATER	0.18	0.01	0.33	-0.5	-0.07	0.2	0.44	0.74	709	1
cor_REGION__ANTHRO__WATER	0.33	0.01	0.32	-0.37	0.13	0.36	0.57	0.83	808	1
cor_REGION__FRAG__WATER	-0.6	0.01	0.29	-0.96	-0.83	-0.67	-0.44	0.1	607	1
r_REGION[1,Intercept]	0.22	0.01	0.21	-0.16	0.13	0.22	0.31	0.6	539	1
r_REGION[2,Intercept]	0.01	0.01	0.22	-0.44	-0.09	0.01	0.11	0.43	580	1
r_REGION[3,Intercept]	-0.06	0.01	0.21	-0.47	-0.15	-0.06	0.03	0.28	531	1
r_REGION[4,Intercept]	0.02	0.01	0.22	-0.39	-0.09	0.01	0.11	0.43	580	1
r_REGION[5,Intercept]	-0.06	0.01	0.21	-0.44	-0.15	-0.06	0.03	0.28	571	1
r_REGION[1,VDEP]	0.17	0	0.03	0.11	0.15	0.17	0.19	0.24	652	1
r_REGION[2,VDEP]	-0.32	0	0.05	-0.42	-0.35	-0.31	-0.28	-0.21	746	1
r_REGION[3,VDEP]	0.3	0	0.06	0.19	0.26	0.3	0.33	0.41	601	1.01
r_REGION[4,VDEP]	0.34	0	0.04	0.26	0.31	0.34	0.37	0.43	680	1
r_REGION[5,VDEP]	0.46	0	0.03	0.4	0.44	0.46	0.48	0.51	641	1
r_REGION[1,ANTHRO]	0.84	0	0.03	0.78	0.81	0.84	0.85	0.89	733	1
r_REGION[2,ANTHRO]	1.69	0	0.07	1.56	1.65	1.69	1.74	1.83	787	1
r_REGION[3,ANTHRO]	0.67	0	0.05	0.57	0.64	0.67	0.71	0.78	623	1
r_REGION[4,ANTHRO]	0.64	0	0.04	0.56	0.61	0.64	0.66	0.71	752	1
r_REGION[5,ANTHRO]	0.5	0	0.02	0.45	0.48	0.5	0.51	0.54	704	1
r_REGION[1,FRAG]	-0.27	0	0.03	-0.32	-0.29	-0.26	-0.25	-0.21	778	1
r_REGION[2,FRAG]	-0.11	0	0.08	-0.26	-0.16	-0.11	-0.06	0.04	750	1
r_REGION[3,FRAG]	-0.03	0	0.04	-0.12	-0.07	-0.04	-0.01	0.05	677	1
r_REGION[4,FRAG]	-0.27	0	0.03	-0.33	-0.29	-0.27	-0.26	-0.22	741	1
r_REGION[5,FRAG]	-0.16	0	0.02	-0.2	-0.17	-0.16	-0.15	-0.13	709	1
r_REGION[1,WATER]	0.29	0	0.02	0.25	0.28	0.29	0.31	0.34	818	1
r_REGION[2,WATER]	0.24	0	0.06	0.12	0.2	0.24	0.28	0.35	706	1
r_REGION[3,WATER]	0.05	0	0.05	-0.04	0.02	0.05	0.08	0.15	739	1
r_REGION[4,WATER]	0.45	0	0.05	0.36	0.42	0.45	0.49	0.56	723	1
r_REGION[5,WATER]	0.24	0	0.02	0.2	0.23	0.24	0.25	0.28	825	1
